# Supplementary material for: Integrating morphological data and chloroplast genome analyses provides novel insights into the phylogeny of Lilium species in China
Source: Research Square preprint supplement (doi:10.21203/rs.3.rs-7136554/v1), 2025-08-08
Supplement: Supplementary file 1 [file 053a378c5679c669b2ef52ca.docx]

**Supplementary Material**

**Table S1** Publicly available plastome sequences download from NCBI GenBank database and National Genomics Data Center.

| Species | Accession No. | Species | Accession No. |
| --- | --- | --- | --- |
| ***Lilium*** | | | |
| *Lilium amoenum* | MT880912 | *Lilium formosanum* | MT261162 |
| *Lilium anhuiense* | MW890005 | *Lilium gongshanense* | MK493297 |
| *Lilium apertum* | MK493293 | *Lilium hansonii* | MT261163 |
| *Lilium bakerianum* | KY748301 | *Lilium henrici* | MH136807 |
| *Lilium brownii* var*. viridulum* | MN906759 | *Lilium henryi* | KY748302 |
| *Lilium bulbiferum* | MW465412 | *Lilium japonicum* | MT261164 |
| *Lilium candidum* | MK753244 | *Lilium longiflorum* | MW900178 |
| *Lilium concolor* | MZ676707 | *Lilium lophophorum* | MK493298 |
| *Lilium davidii* | MW890008 | *Lilium martagon* var. *pilosiusculum* | MF964219 |
| *Lilium duchartrei* | KY748300 | *Lilium matangense* | MN745201 |
| *Lilium fargesii* | KX592156 | *Lilium meleagrina* | MK493299 |
| *Lilium nanum* | MK493300 | *Lilium souliei* | MW007720 |
| *Lilium nepalense* | MK493301 | *Lilium stewartianum* | MN745202 |
| *Lilium pardalinum* | MH029495 | *Lilium sulphureum* | MK493304 |
| *Lilium pardanthinum* | MG704135 | *Lilium superbum* | KP462883 |
| *Lilium philadelphicum* | KY940847 | *Lilium taliense* | KY009938 |
| *Lilium primulinum* var. *burmanicum* | MZ188968 | *Lilium tsingtauense* | KU230438 |
| *Lilium primulinum* var. *ochraceum* | KY748298 | *Lilium washingtonianum* | MG590100 |
| *Lilium regale* | MK493302 | *Lilium distichum* | OP784239 |
| *Lilium rosthornii* | MW890009 | *Lilium lancifolium* | OP784241 |
| *Lilium sargentiae* | MK493303 | *Lilium lankongense* | OP784243 |
| *Lilium amabile* | OP784235 | *Lilium leichtlinii* var. *maximowiczii* | OP756529 |
| *Lilium brownii* | OP784240 | *Lilium leucanthum* | OP784242 |
| *Lilium callosum* | OP784236 | *Lilium pensylvanicum* | OP784234 |
| *Lilium cernuum* | OP784238 | *Lilium pumilum* | OP784237 |
| *Lilium concolor* var. *pulchellum* | MZ751064 | *Lilium speciosum* var. *gloriosoides* | OP784246 |
| *Lilium pumilum* | OP784237 | *Lilium wardii* | OP784244 |
| *Lilium paradoxum* | PP073960 | *Lilium sealyi* | OR350449 |
| *Lilium meleagrinum* | NC_052788 | *Lilium saccatum* | OR353687 |
| *Lilium medogense* | OR797709 | *Lilium martagon* var. *pilosiusculum* | NC_039162 |
| *Lilium liangiae* | OR353692 | *Lilium saluenense* | OR353701 |
| *Lilium yapingense* | OR353695 |  |  |
| **Outgroup** |  |  |  |
| *Cardiocrinum giganteum* | NC_033896 | *Fritillaria cirrhosa* | NC_034369 |
| *Notholirion macrophyllum* | MH011354 |  |  |

**Table S2.** Characteristics of the complete chloroplast genomes for *Lilium*.

| **Species** | **Total(bp)** | **LSC (bp)** | **SSC (bp)** | **IR (bp)** | **GC (%)** |
| --- | --- | --- | --- | --- | --- |
| *L. amabile* | 152567 | 82001 | 17582 | 26492 | 37.03 |
| *L.moenum* | 152280 | 81977 | 17539 | 26382 | 37 |
| *L. anhuiense* | 152,652 | 82,090 | 17,522 | 26,520 | 37 |
| *L. apertum* | 152042 | 81695 | 17533 | 26407 | 37 |
| *L. bakerianum* | 151655 | 81222 | 17581 | 26426 | 37.03 |
| *L. brownii* | 152675 | 82086 | 17519 | 26526 | 37 |
| *L.brownii var. viridulum* | *152665* | *82085* | *17528* | *26526* | *37* |
| *L. bulbiferum* | 152686 | 82084 | 17618 | 26492 | 37 |
| *L. callosum* | 152626 | 82040 | 17604 | 26491 | 37.01 |
| *L. candidum* | 152,101 | 81,482 | 17,643 | 26,488 | 37 |
| *L. cernuum* | 152604 | 82059 | 17583 | 26481 | 37 |
| *L. concolor* | 152625 | 82056 | 17585 | 26492 | 37 |
| *L. concolor* var. *pulchellum* | 152626 | 82057 | 17585 | 26492 | 37 |
| *L. davidii* | 152126 | 81465 | 17647 | 26507 | 37.05 |
| *L. davidii* var. *willmottiae* | 152125 | 81465 | 17647 | 26506 | 37 |
| *L. distichum* | 152644 | 82028 | 17620 | 26498 | 37.01 |
| *L. duchartrei* | 152287 | 81593 | 17546 | 26574 | 37.03 |
| *L. fargesii* | 153235 | 82218 | 17037 | 26990 | 36.91 |
| *L. formosanum* | 152,653 | 82,102 | 17,523 | 26,514 | 37 |
| *L. gongshanense* | 151974 | 81624 | 17536 | 26407 | 37.01 |
| *L. hansonii* | 152618 | 82,052 | 17,619 | 26,492 | 37 |
| *L. henrici* | 152784 | 82429 | 17533 | 26411 | 37 |
| *L. henryi* | 153119 | 82480 | 17533 | 26553 | 36.97 |
| *L. japonicum* | 152,613 | 82,039 | 17,486 | 26,544 | 37.1 |
| *L.jiulongense*1 | 152632 | 82024 | 17508 | 26550 | 37.01 |
| *L. jiulongense*2 | 152622 | 82024 | 17508 | 26550 | 37.01 |
| *L. jiulongense*3 | 152622 | 82014 | 17508 | 26550 | 37.01 |
| *L. lancifolium* | 152574 | 82007 | 17583 | 26492 | 37.03 |
| *L. lankongense* | 152611 | 81996 | 17505 | 26555 | 37.04 |
| *L. leichtlinii* var. *maximowiczii* | 152590 | 82005 | 17601 | 26492 | 37.03 |
| *L. leucanthum* | 152683 | 82086 | 17527 | 26526 | 37 |
| *L. liangiae* | 152,547 | 81,939 | 17,536 | 26,536 | 37 |
| *L. longiflorum* | 152,793 | 82,231 | 17,494 | 26,534 | 37 |
| *L. lophophorum* | 152,397 | 82,032 | 17,493 | 26,436 | 37 |
| *L. martagon* var. *pilosiusculum* | 152807 | 82265 | 17541 | 26505 | 37 |
| *L. matangense* | 152402 | 82018 | 17530 | 26427 | 37 |
| *L. medogense* | 152,357 | 82,002 | 17,525 | 26,415 | 37 |
| *L. meleagrinum* | 152197 | 81842 | 17533 | 26411 | 37 |
| *L. meleagrinum*2 | 152,437 | 81,864 | 17,533 | 26,520 | 37 |
| *L. nanum* | 152,859 | 82,052 | 17,031 | 26,888 | 37 |
| *L. nepalense* | 152,915 | 82,472 | 17,429 | 26,507 | 37 |
| *L. paradoxum* | 151,839 | 81,469 | 17,528 | 26,421 | 37 |
| *L. pardalinum* | 151969 | 81402 | 17345 | 26611 | 37 |
| *L. pardanthinum* | 152718 | 82154 | 17524 | 26520 | 36.95 |
| *L. pensylvanicum* | 152052 | 81484 | 17584 | 26492 | 37.05 |
| *L. philadelphicum* | 152175 | 81585 | 17520 | 26537 | 37.1 |
| *L. primulinum* var. *burmanicum* | 152307 | 81956 | 17565 | 26394 | 37 |
| *L. primulinum* var. *ochraceum* | 152306 | 81954 | 17564 | 26394 | 37 |
| *L. pumilum* | 152573 | 82009 | 17580 | 26492 | 37.02 |
| *L. regale* | 153082 | 82460 | 17526 | 26548 | 36.97 |
| *L. rosthornii* | 152613 | 82279 | 17792 | 26271 | 37 |
| *L. saccatum* | 151839 | 81,469 | 17528 | 26421 | 37 |
| *L. saluenense* | 152,046 | 81,698 | 17,468 | 26,440 | 37 |
| *L. sargentiae* | 153129 | 82496 | 17527 | 26553 | 36.98 |
| *L. sealyi* | 152,023 | 81,877 | 17,290 | 26,428 | 37 |
| *L. souliei* | 152,324 | 81,806 | 17,616 | 26,451 | 37 |
| *L. speciosum* var. *gloriosoides* | 152597 | 82035 | 17474 | 26544 | 37.07 |
| *L. sulphureum* | 153099 | 82473 | 17520 | 26553 | 37 |
| *L. superbum* | 152,069 | 81,403 | 17,428 | 26,619 | 37 |
| *L. taliense* | 153055 | 82458 | 17511 | 26543 | 36.95 |
| *L. tsingtauense* | 151983 | 81425 | 17574 | 26492 | 37.04 |
| *L. wardii* | 152,270 | 82,247 | 17,395 | 26,314 | 37 |
| *L. washingtonianum* | 151,967 | 81,394 | 17,351 | 26,611 | 37.1 |
| *L. xanthellum* | 152307 | 81922 | 17531 | 26427 | 37 |
| *L. yapingense* | 152,035 | 82,034 | 17,287 | 26,357 | 37 |

**Table S3**. List of genes present in the *L. jiulongense* chloroplast genome.

| Classiﬁcation of Genes |  | Name of Gene(s) |
| --- | --- | --- |
| RNA genes | Ribosomal RNAs | *rrn4.5*(x2), *rrn5*(x2), *rrn16*(x2), *rrn23*(x2) |
| Transfer RNAs | *trnA-UGC*(×2)*, *trnC-GCA*, *trnD-GUC*, *trnE-UUC*, *trnF-GAA*, *trnG-UCC*, *trnG-GCC*, *trnH-GUG*(×2), *trnI-CAU*(×2), *trnIGAU*(×2)*, *trnK-UUU**, *trnL-UAA**, *trnL-UAG*, *trnL-CAA*(×2), *trnfM-CAU*, *trnM-CAU*, *trnN-GUU*(×2), *trnP-UGG*, *trnQUUG*, *trnR-ACG*(×2), *trnR-UCU*, *trnS-GCU*, *trnS-GGA*, *trnSUGA*, *trnT-GGU*, *trnT-UGU*, *trnV-UAC**, *trnV-GAC*(×2),  *trnW-CCA*, *trnY-GUA* |
| Protein genes | Photosynthesis |  |
| Photosystem I | *psaA*, *psaB*, *psaC*, *psa*I, *psaJ* |
| Photosystem II | *psbA, psbB, psbC, psbD, psbE, psbF, psbH,*  *psbI, psbJ, psbK, psbL, psbM, psbN, psbT, psbZ* |
| Cytochrome | *petA*, *petB*, *petD*, *petG*, *petL*, *petN* |
| ATP synthase | *atpA*, *atpB*, *atpE*, *atpF*, *atpH*, *atpI* |
| Rubisco | *rbcL* |
| NADH dehydrogenease | *ndhA*, *ndhB*(x2), *ndhC*, *ndhD*, *ndhE*, *ndhF*,  *ndhG*, *ndhH*, *ndhI*, *ndhJ*, *ndhK* |
| ATP-dependent protease subunit P | *clpP* |
| Chloroplast envelope membrane protein | *cemA* |
| Ribosomal proteins | large units | *rpl2*(x2), *rpl14*, *rpl16*, *rpl20*, *rpl22*, *rpl23*(x2), *rpl32*, *rpl33*, *rpl36* |
| small units | *rps2*, *rps3*, *rps4*, *rps7*(x2), *rps8*, *rps11*,  *rps12*(x2), *rps14*, *rps15*, *rps16*, *rps18*, *rps19*(x2) |
| Transcription/translation | RNA polymerase | *rpoA*, *rpoB*, *rpoC1*, *rpoC2* |
| Miscellaneous proteins | *accD*, *ccsA*, *matK* |
| Hypothetical proteins &  Conserved reading frame | *ycf1*(x2), *ycf2*(x2), *ycf3*, *ycf4* |

**Table S4.** RSCU analysis of each amino acid codon in the chloroplast genome of *Liliumm* species.

| specise | **AminoAcid** | **Codon** | **Number** | **RSCU value** | **AminoAcid** | **Codon** | **Number** | **RSCU value** |
| --- | --- | --- | --- | --- | --- | --- | --- | --- |
| *Lilium henrici* | Ter | UAA | 38 | 1.4805 | Tyr | UAU | 644 | 1.6324 |
| Ter | UAG | 19 | 0.7403 | Met | AUG | 505 | 1 |
| Ter | UGA | 20 | 0.7792 | Asn | AAC | 197 | 0.4126 |
| Ala | GCA | 344 | 1.1316 | Asn | AAU | 758 | 1.5874 |
| Ala | GCC | 189 | 0.6217 | Pro | CCA | 248 | 1.1363 |
| Ala | GCG | 139 | 0.4572 | Pro | CCC | 191 | 0.8751 |
| Ala | GCU | 544 | 1.7895 | Pro | CCG | 94 | 0.4307 |
| Cys | UGC | 56 | 0.4628 | Pro | CCU | 340 | 1.5578 |
| Cys | UGU | 186 | 1.5372 | Gln | CAA | 547 | 1.4925 |
| Asp | GAC | 168 | 0.4143 | Gln | CAG | 186 | 0.5075 |
| Asp | GAU | 643 | 1.5857 | Arg | AGA | 376 | 1.8282 |
| Glu | GAA | 790 | 1.5005 | Arg | AGG | 111 | 0.5397 |
| Glu | GAG | 263 | 0.4995 | Arg | CGA | 275 | 1.3371 |
| Phe | UUC | 401 | 0.689 | Arg | CGC | 81 | 0.3938 |
| Phe | UUU | 763 | 1.311 | Arg | CGG | 101 | 0.4911 |
| Gly | GGA | 586 | 1.5606 | Arg | CGU | 290 | 1.41 |
| Gly | GGC | 172 | 0.4581 | Ser | AGC | 79 | 0.2972 |
| Gly | GGG | 256 | 0.6818 | Ser | AGU | 354 | 1.3317 |
| Gly | GGU | 488 | 1.2996 | Ser | UCA | 324 | 1.2188 |
| His | CAC | 104 | 0.4135 | Ser | UCC | 258 | 0.9705 |
| His | CAU | 399 | 1.5865 | Ser | UCG | 138 | 0.5191 |
| Ile | AUA | 606 | 0.9822 | Ser | UCU | 442 | 1.6627 |
| Ile | AUC | 354 | 0.5737 | Thr | ACA | 340 | 1.2698 |
| Ile | AUU | 891 | 1.4441 | Thr | ACC | 185 | 0.6909 |
| Lys | AAA | 736 | 1.4975 | Thr | ACG | 103 | 0.3847 |
| Lys | AAG | 247 | 0.5025 | Thr | ACU | 443 | 1.6545 |
| Leu | CUA | 280 | 0.7728 | Val | GUA | 445 | 1.4809 |
| Leu | CUC | 140 | 0.3864 | Val | GUC | 148 | 0.4925 |
| Leu | CUG | 121 | 0.3339 | Val | GUG | 163 | 0.5424 |
| Leu | CUU | 455 | 1.2557 | Val | GUU | 446 | 1.4842 |
| Leu | UUA | 747 | 2.0616 | Trp | UGG | 365 | 1 |
| Leu | UUG | 431 | 1.1895 | Tyr | UAC | 145 | 0.3676 |
| *Lilium speciosum* var. *gloriosoides* | Ter | UAA | 38 | 1.4805 | Met | AUG | 541 | 1 |
| Ter | UAG | 19 | 0.7403 | Asn | AAC | 232 | 0.423 |
| Ter | UGA | 20 | 0.7792 | Asn | AAU | 865 | 1.577 |
| Ala | GCA | 344 | 1.1316 | Pro | CCA | 260 | 1.1292 |
| Ala | GCC | 189 | 0.6217 | Pro | CCC | 198 | 0.8599 |
| Ala | GCG | 139 | 0.4572 | Pro | CCG | 105 | 0.456 |
| Ala | GCU | 544 | 1.7895 | Pro | CCU | 358 | 1.5548 |
| Cys | UGC | 56 | 0.4628 | Gln | CAA | 605 | 1.522 |
| Cys | UGU | 186 | 1.5372 | Gln | CAG | 190 | 0.478 |
| Asp | GAC | 168 | 0.4143 | Arg | AGA | 410 | 1.8594 |
| Asp | GAU | 643 | 1.5857 | Arg | AGG | 121 | 0.5488 |
| Glu | GAA | 790 | 1.5005 | Arg | CGA | 297 | 1.3469 |
| Glu | GAG | 263 | 0.4995 | Arg | CGC | 79 | 0.3583 |
| Phe | UUC | 401 | 0.689 | Arg | CGG | 107 | 0.4853 |
| Phe | UUU | 763 | 1.311 | Arg | CGU | 309 | 1.4014 |
| Gly | GGA | 586 | 1.5606 | Ser | AGC | 84 | 0.2918 |
| Gly | GGC | 172 | 0.4581 | Ser | AGU | 377 | 1.3098 |
| Gly | GGG | 256 | 0.6818 | Ser | UCA | 361 | 1.2542 |
| Gly | GGU | 488 | 1.2996 | Ser | UCC | 274 | 0.9519 |
| His | CAC | 104 | 0.4135 | Ser | UCG | 150 | 0.5211 |
| His | CAU | 399 | 1.5865 | Ser | UCU | 481 | 1.6711 |
| Ile | AUA | 606 | 0.9822 | Thr | ACA | 368 | 1.2712 |
| Ile | AUC | 354 | 0.5737 | Thr | ACC | 207 | 0.715 |
| Ile | AUU | 891 | 1.4441 | Thr | ACG | 117 | 0.4041 |
| Lys | AAA | 736 | 1.4975 | Thr | ACU | 466 | 1.6097 |
| Lys | AAG | 247 | 0.5025 | Val | GUA | 467 | 1.4697 |
| Leu | CUA | 280 | 0.7728 | Val | GUC | 162 | 0.5098 |
| Leu | CUC | 140 | 0.3864 | Val | GUG | 171 | 0.5382 |
| Leu | CUG | 121 | 0.3339 | Val | GUU | 471 | 1.4823 |
| Leu | CUU | 455 | 1.2557 | Trp | UGG | 402 | 1 |
| Leu | UUA | 747 | 2.0616 | Tyr | UAC | 163 | 0.3734 |
| Leu | UUG | 431 | 1.1895 | Tyr | UAU | 710 | 1.6266 |
| *Lilium lankongense* | Ter | UAA | 39 | 1.5195 | Met | AUG | 545 | 1 |
| Ter | UAG | 19 | 0.7403 | Asn | AAC | 233 | 0.4275 |
| Ter | UGA | 19 | 0.7403 | Asn | AAU | 857 | 1.5725 |
| Ala | GCA | 356 | 1.1465 | Pro | CCA | 263 | 1.1385 |
| Ala | GCC | 194 | 0.6248 | Pro | CCC | 199 | 0.8615 |
| Ala | GCG | 143 | 0.4605 | Pro | CCG | 104 | 0.4502 |
| Ala | GCU | 549 | 1.7681 | Pro | CCU | 358 | 1.5498 |
| Cys | UGC | 61 | 0.4747 | Gln | CAA | 601 | 1.5158 |
| Cys | UGU | 196 | 1.5253 | Gln | CAG | 192 | 0.4842 |
| Asp | GAC | 181 | 0.4009 | Arg | AGA | 407 | 1.843 |
| Asp | GAU | 722 | 1.5991 | Arg | AGG | 121 | 0.5479 |
| Glu | GAA | 899 | 1.5212 | Arg | CGA | 298 | 1.3494 |
| Glu | GAG | 283 | 0.4788 | Arg | CGC | 81 | 0.3668 |
| Phe | UUC | 427 | 0.6756 | Arg | CGG | 110 | 0.4981 |
| Phe | UUU | 837 | 1.3244 | Arg | CGU | 308 | 1.3947 |
| Gly | GGA | 623 | 1.6057 | Ser | AGC | 81 | 0.2844 |
| Gly | GGC | 171 | 0.4407 | Ser | AGU | 372 | 1.306 |
| Gly | GGG | 257 | 0.6624 | Ser | UCA | 354 | 1.2428 |
| Gly | GGU | 501 | 1.2912 | Ser | UCC | 276 | 0.969 |
| His | CAC | 110 | 0.4104 | Ser | UCG | 151 | 0.5301 |
| His | CAU | 426 | 1.5896 | Ser | UCU | 475 | 1.6676 |
| Ile | AUA | 675 | 1.0135 | Thr | ACA | 367 | 1.2677 |
| Ile | AUC | 368 | 0.5526 | Thr | ACC | 205 | 0.7081 |
| Ile | AUU | 955 | 1.4339 | Thr | ACG | 116 | 0.4007 |
| Lys | AAA | 902 | 1.5058 | Thr | ACU | 470 | 1.6235 |
| Lys | AAG | 296 | 0.4942 | Val | GUA | 463 | 1.4652 |
| Leu | CUA | 307 | 0.7899 | Val | GUC | 159 | 0.5032 |
| Leu | CUC | 148 | 0.3808 | Val | GUG | 172 | 0.5443 |
| Leu | CUG | 132 | 0.3396 | Val | GUU | 470 | 1.4873 |
| Leu | CUU | 492 | 1.2659 | Trp | UGG | 400 | 1 |
| Leu | UUA | 802 | 2.0635 | Tyr | UAC | 162 | 0.3711 |
| Leu | UUG | 451 | 1.1604 | Tyr | UAU | 711 | 1.6289 |
| *Lilium pumilum* | Ter | UAA | 41 | 1.5769 | Met | AUG | 551 | 1 |
| Ter | UAG | 19 | 0.7308 | Asn | AAC | 229 | 0.419 |
| Ter | UGA | 18 | 0.6923 | Asn | AAU | 864 | 1.581 |
| Ala | GCA | 361 | 1.1598 | Pro | CCA | 268 | 1.1539 |
| Ala | GCC | 194 | 0.6233 | Pro | CCC | 199 | 0.8568 |
| Ala | GCG | 136 | 0.4369 | Pro | CCG | 103 | 0.4435 |
| Ala | GCU | 554 | 1.7799 | Pro | CCU | 359 | 1.5457 |
| Cys | UGC | 60 | 0.4615 | Gln | CAA | 605 | 1.5144 |
| Cys | UGU | 200 | 1.5385 | Gln | CAG | 194 | 0.4856 |
| Asp | GAC | 181 | 0.3982 | Arg | AGA | 416 | 1.8599 |
| Asp | GAU | 728 | 1.6018 | Arg | AGG | 124 | 0.5544 |
| Glu | GAA | 902 | 1.5224 | Arg | CGA | 303 | 1.3547 |
| Glu | GAG | 283 | 0.4776 | Arg | CGC | 80 | 0.3577 |
| Phe | UUC | 424 | 0.6677 | Arg | CGG | 107 | 0.4784 |
| Phe | UUU | 846 | 1.3323 | Arg | CGU | 312 | 1.3949 |
| Gly | GGA | 613 | 1.5738 | Ser | AGC | 84 | 0.2927 |
| Gly | GGC | 168 | 0.4313 | Ser | AGU | 379 | 1.3206 |
| Gly | GGG | 271 | 0.6958 | Ser | UCA | 356 | 1.2404 |
| Gly | GGU | 506 | 1.2991 | Ser | UCC | 277 | 0.9652 |
| His | CAC | 108 | 0.4 | Ser | UCG | 146 | 0.5087 |
| His | CAU | 432 | 1.6 | Ser | UCU | 480 | 1.6725 |
| Ile | AUA | 674 | 1.007 | Thr | ACA | 367 | 1.2558 |
| Ile | AUC | 371 | 0.5543 | Thr | ACC | 209 | 0.7151 |
| Ile | AUU | 963 | 1.4387 | Thr | ACG | 121 | 0.414 |
| Lys | AAA | 905 | 1.5046 | Thr | ACU | 472 | 1.6151 |
| Lys | AAG | 298 | 0.4954 | Val | GUA | 472 | 1.4727 |
| Leu | CUA | 305 | 0.7801 | Val | GUC | 161 | 0.5023 |
| Leu | CUC | 149 | 0.3811 | Val | GUG | 173 | 0.5398 |
| Leu | CUG | 129 | 0.3299 | Val | GUU | 476 | 1.4852 |
| Leu | CUU | 497 | 1.2711 | Trp | UGG | 404 | 1 |
| Leu | UUA | 811 | 2.0742 | Tyr | UAC | 158 | 0.3628 |
| Leu | UUG | 455 | 1.1637 | Tyr | UAU | 713 | 1.6372 |
| *Lilium xanthellum* | Ter | UAA | 40 | 1.5584 | Met | AUG | 544 | 1 |
| Ter | UAG | 18 | 0.7013 | Asn | AAC | 233 | 0.4252 |
| Ter | UGA | 19 | 0.7403 | Asn | AAU | 863 | 1.5748 |
| Ala | GCA | 357 | 1.1479 | Pro | CCA | 265 | 1.1459 |
| Ala | GCC | 193 | 0.6206 | Pro | CCC | 200 | 0.8649 |
| Ala | GCG | 144 | 0.463 | Pro | CCG | 102 | 0.4411 |
| Ala | GCU | 550 | 1.7685 | Pro | CCU | 358 | 1.5481 |
| Cys | UGC | 62 | 0.4844 | Gln | CAA | 603 | 1.5189 |
| Cys | UGU | 194 | 1.5156 | Gln | CAG | 191 | 0.4811 |
| Asp | GAC | 183 | 0.4053 | Arg | AGA | 411 | 1.8541 |
| Asp | GAU | 720 | 1.5947 | Arg | AGG | 122 | 0.5504 |
| Glu | GAA | 900 | 1.5228 | Arg | CGA | 298 | 1.3444 |
| Glu | GAG | 282 | 0.4772 | Arg | CGC | 82 | 0.3699 |
| Phe | UUC | 427 | 0.6719 | Arg | CGG | 111 | 0.5008 |
| Phe | UUU | 844 | 1.3281 | Arg | CGU | 306 | 1.3805 |
| Gly | GGA | 619 | 1.5985 | Ser | AGC | 84 | 0.2942 |
| Gly | GGC | 173 | 0.4467 | Ser | AGU | 372 | 1.303 |
| Gly | GGG | 259 | 0.6688 | Ser | UCA | 353 | 1.2364 |
| Gly | GGU | 498 | 1.286 | Ser | UCC | 277 | 0.9702 |
| His | CAC | 110 | 0.4097 | Ser | UCG | 152 | 0.5324 |
| His | CAU | 427 | 1.5903 | Ser | UCU | 475 | 1.6637 |
| Ile | AUA | 679 | 1.0155 | Thr | ACA | 369 | 1.2768 |
| Ile | AUC | 368 | 0.5503 | Thr | ACC | 206 | 0.7128 |
| Ile | AUU | 959 | 1.4342 | Thr | ACG | 116 | 0.4014 |
| Lys | AAA | 903 | 1.505 | Thr | ACU | 465 | 1.609 |
| Lys | AAG | 297 | 0.495 | Val | GUA | 466 | 1.47 |
| Leu | CUA | 304 | 0.7832 | Val | GUC | 159 | 0.5016 |
| Leu | CUC | 147 | 0.3787 | Val | GUG | 172 | 0.5426 |
| Leu | CUG | 131 | 0.3375 | Val | GUU | 471 | 1.4858 |
| Leu | CUU | 491 | 1.2649 | Trp | UGG | 399 | 1 |
| Leu | UUA | 801 | 2.0635 | Tyr | UAC | 161 | 0.3667 |
| Leu | UUG | 455 | 1.1722 | Tyr | UAU | 717 | 1.6333 |
| *Lilium pensylvanicum* | Ter | UAA | 41 | 1.5769 | Met | AUG | 546 | 1 |
| Ter | UAG | 19 | 0.7308 | Asn | AAC | 226 | 0.4147 |
| Ter | UGA | 18 | 0.6923 | Asn | AAU | 864 | 1.5853 |
| Ala | GCA | 360 | 1.165 | Pro | CCA | 266 | 1.1578 |
| Ala | GCC | 192 | 0.6214 | Pro | CCC | 194 | 0.8444 |
| Ala | GCG | 132 | 0.4272 | Pro | CCG | 102 | 0.444 |
| Ala | GCU | 552 | 1.7864 | Pro | CCU | 357 | 1.5539 |
| Cys | UGC | 59 | 0.4521 | Gln | CAA | 603 | 1.517 |
| Cys | UGU | 202 | 1.5479 | Gln | CAG | 192 | 0.483 |
| Asp | GAC | 181 | 0.4009 | Arg | AGA | 408 | 1.8378 |
| Asp | GAU | 722 | 1.5991 | Arg | AGG | 122 | 0.5495 |
| Glu | GAA | 900 | 1.5228 | Arg | CGA | 305 | 1.3739 |
| Glu | GAG | 282 | 0.4772 | Arg | CGC | 80 | 0.3604 |
| Phe | UUC | 427 | 0.6714 | Arg | CGG | 109 | 0.491 |
| Phe | UUU | 845 | 1.3286 | Arg | CGU | 308 | 1.3874 |
| Gly | GGA | 609 | 1.5849 | Ser | AGC | 83 | 0.2897 |
| Gly | GGC | 167 | 0.4346 | Ser | AGU | 378 | 1.3194 |
| Gly | GGG | 264 | 0.6871 | Ser | UCA | 355 | 1.2391 |
| Gly | GGU | 497 | 1.2934 | Ser | UCC | 277 | 0.9668 |
| His | CAC | 109 | 0.4037 | Ser | UCG | 146 | 0.5096 |
| His | CAU | 431 | 1.5963 | Ser | UCU | 480 | 1.6754 |
| Ile | AUA | 667 | 1.0005 | Thr | ACA | 364 | 1.253 |
| Ile | AUC | 373 | 0.5595 | Thr | ACC | 208 | 0.716 |
| Ile | AUU | 960 | 1.44 | Thr | ACG | 120 | 0.4131 |
| Lys | AAA | 893 | 1.5034 | Thr | ACU | 470 | 1.6179 |
| Lys | AAG | 295 | 0.4966 | Val | GUA | 463 | 1.4629 |
| Leu | CUA | 307 | 0.7902 | Val | GUC | 160 | 0.5055 |
| Leu | CUC | 147 | 0.3784 | Val | GUG | 171 | 0.5403 |
| Leu | CUG | 128 | 0.3295 | Val | GUU | 472 | 1.4913 |
| Leu | CUU | 495 | 1.2741 | Trp | UGG | 401 | 1 |
| Leu | UUA | 801 | 2.0618 | Tyr | UAC | 159 | 0.3668 |
| Leu | UUG | 453 | 1.166 | Tyr | UAU | 708 | 1.6332 |
| *Lilium distichum* | Ter | UAA | 41 | 1.5769 | Met | AUG | 547 | 1 |
| Ter | UAG | 19 | 0.7308 | Asn | AAC | 229 | 0.4175 |
| Ter | UGA | 18 | 0.6923 | Asn | AAU | 868 | 1.5825 |
| Ala | GCA | 362 | 1.164 | Pro | CCA | 269 | 1.1582 |
| Ala | GCC | 193 | 0.6206 | Pro | CCC | 197 | 0.8482 |
| Ala | GCG | 135 | 0.4341 | Pro | CCG | 102 | 0.4392 |
| Ala | GCU | 554 | 1.7814 | Pro | CCU | 361 | 1.5544 |
| Cys | UGC | 60 | 0.458 | Gln | CAA | 605 | 1.5182 |
| Cys | UGU | 202 | 1.542 | Gln | CAG | 192 | 0.4818 |
| Asp | GAC | 182 | 0.4009 | Arg | AGA | 417 | 1.8575 |
| Asp | GAU | 726 | 1.5991 | Arg | AGG | 123 | 0.5479 |
| Glu | GAA | 903 | 1.5215 | Arg | CGA | 303 | 1.3497 |
| Glu | GAG | 284 | 0.4785 | Arg | CGC | 81 | 0.3608 |
| Phe | UUC | 426 | 0.6682 | Arg | CGG | 110 | 0.49 |
| Phe | UUU | 849 | 1.3318 | Arg | CGU | 313 | 1.3942 |
| Gly | GGA | 615 | 1.581 | Ser | AGC | 84 | 0.2917 |
| Gly | GGC | 168 | 0.4319 | Ser | AGU | 382 | 1.3264 |
| Gly | GGG | 268 | 0.6889 | Ser | UCA | 355 | 1.2326 |
| Gly | GGU | 505 | 1.2982 | Ser | UCC | 278 | 0.9653 |
| His | CAC | 108 | 0.4 | Ser | UCG | 147 | 0.5104 |
| His | CAU | 432 | 1.6 | Ser | UCU | 482 | 1.6736 |
| Ile | AUA | 674 | 1.0055 | Thr | ACA | 366 | 1.2556 |
| Ile | AUC | 373 | 0.5564 | Thr | ACC | 209 | 0.717 |
| Ile | AUU | 964 | 1.4381 | Thr | ACG | 122 | 0.4185 |
| Lys | AAA | 905 | 1.5058 | Thr | ACU | 469 | 1.6089 |
| Lys | AAG | 297 | 0.4942 | Val | GUA | 469 | 1.4679 |
| Leu | CUA | 303 | 0.7759 | Val | GUC | 160 | 0.5008 |
| Leu | CUC | 150 | 0.3841 | Val | GUG | 174 | 0.5446 |
| Leu | CUG | 129 | 0.3303 | Val | GUU | 475 | 1.4867 |
| Leu | CUU | 496 | 1.2702 | Trp | UGG | 403 | 1 |
| Leu | UUA | 812 | 2.0794 | Tyr | UAC | 160 | 0.3674 |
| Leu | UUG | 453 | 1.1601 | Tyr | UAU | 711 | 1.6326 |
| *Lilium pardanthinum* | Ter | UAA | 39 | 1.5195 | Met | AUG | 548 | 1 |
| Ter | UAG | 19 | 0.7403 | Asn | AAC | 230 | 0.4186 |
| Ter | UGA | 19 | 0.7403 | Asn | AAU | 869 | 1.5814 |
| Ala | GCA | 357 | 1.1516 | Pro | CCA | 264 | 1.1453 |
| Ala | GCC | 194 | 0.6258 | Pro | CCC | 198 | 0.859 |
| Ala | GCG | 141 | 0.4548 | Pro | CCG | 102 | 0.4425 |
| Ala | GCU | 548 | 1.7677 | Pro | CCU | 358 | 1.5531 |
| Cys | UGC | 61 | 0.471 | Gln | CAA | 606 | 1.5188 |
| Cys | UGU | 198 | 1.529 | Gln | CAG | 192 | 0.4812 |
| Asp | GAC | 180 | 0.4013 | Arg | AGA | 410 | 1.858 |
| Asp | GAU | 717 | 1.5987 | Arg | AGG | 121 | 0.5483 |
| Glu | GAA | 904 | 1.5245 | Arg | CGA | 298 | 1.3505 |
| Glu | GAG | 282 | 0.4755 | Arg | CGC | 81 | 0.3671 |
| Phe | UUC | 422 | 0.6656 | Arg | CGG | 111 | 0.503 |
| Phe | UUU | 846 | 1.3344 | Arg | CGU | 303 | 1.3731 |
| Gly | GGA | 620 | 1.5979 | Ser | AGC | 86 | 0.3003 |
| Gly | GGC | 172 | 0.4433 | Ser | AGU | 372 | 1.2992 |
| Gly | GGG | 260 | 0.6701 | Ser | UCA | 360 | 1.2573 |
| Gly | GGU | 500 | 1.2887 | Ser | UCC | 277 | 0.9674 |
| His | CAC | 109 | 0.403 | Ser | UCG | 147 | 0.5134 |
| His | CAU | 432 | 1.597 | Ser | UCU | 476 | 1.6624 |
| Ile | AUA | 678 | 1.015 | Thr | ACA | 372 | 1.2828 |
| Ile | AUC | 369 | 0.5524 | Thr | ACC | 206 | 0.7103 |
| Ile | AUU | 957 | 1.4326 | Thr | ACG | 114 | 0.3931 |
| Lys | AAA | 905 | 1.5109 | Thr | ACU | 468 | 1.6138 |
| Lys | AAG | 293 | 0.4891 | Val | GUA | 467 | 1.4778 |
| Leu | CUA | 304 | 0.7815 | Val | GUC | 155 | 0.4905 |
| Leu | CUC | 151 | 0.3882 | Val | GUG | 172 | 0.5443 |
| Leu | CUG | 129 | 0.3316 | Val | GUU | 470 | 1.4873 |
| Leu | CUU | 491 | 1.2622 | Trp | UGG | 398 | 1 |
| Leu | UUA | 805 | 2.0694 | Tyr | UAC | 164 | 0.3749 |
| Leu | UUG | 454 | 1.1671 | Tyr | UAU | 711 | 1.6251 |
| *Lilium callosum* | Ter | UAA | 34 | 1.5455 | Met | AUG | 418 | 1 |
| Ter | UAG | 16 | 0.7273 | Asn | AAC | 179 | 0.4287 |
| Ter | UGA | 16 | 0.7273 | Asn | AAU | 656 | 1.5713 |
| Ala | GCA | 300 | 1.1331 | Pro | CCA | 225 | 1.1524 |
| Ala | GCC | 170 | 0.6421 | Pro | CCC | 166 | 0.8502 |
| Ala | GCG | 117 | 0.4419 | Pro | CCG | 86 | 0.4405 |
| Ala | GCU | 472 | 1.7828 | Pro | CCU | 304 | 1.557 |
| Cys | UGC | 49 | 0.4851 | Gln | CAA | 482 | 1.474 |
| Cys | UGU | 153 | 1.5149 | Gln | CAG | 172 | 0.526 |
| Asp | GAC | 142 | 0.3939 | Arg | AGA | 340 | 1.8021 |
| Asp | GAU | 579 | 1.6061 | Arg | AGG | 107 | 0.5671 |
| Glu | GAA | 713 | 1.4777 | Arg | CGA | 257 | 1.3622 |
| Glu | GAG | 252 | 0.5223 | Arg | CGC | 68 | 0.3604 |
| Phe | UUC | 355 | 0.7275 | Arg | CGG | 93 | 0.4929 |
| Phe | UUU | 621 | 1.2725 | Arg | CGU | 267 | 1.4152 |
| Gly | GGA | 496 | 1.511 | Ser | AGC | 73 | 0.3283 |
| Gly | GGC | 149 | 0.4539 | Ser | AGU | 298 | 1.3403 |
| Gly | GGG | 234 | 0.7129 | Ser | UCA | 257 | 1.1559 |
| Gly | GGU | 434 | 1.3222 | Ser | UCC | 230 | 1.0345 |
| His | CAC | 91 | 0.3982 | Ser | UCG | 107 | 0.4813 |
| His | CAU | 366 | 1.6018 | Ser | UCU | 369 | 1.6597 |
| Ile | AUA | 473 | 0.9397 | Thr | ACA | 278 | 1.188 |
| Ile | AUC | 298 | 0.5921 | Thr | ACC | 166 | 0.7094 |
| Ile | AUU | 739 | 1.4682 | Thr | ACG | 107 | 0.4573 |
| Lys | AAA | 654 | 1.468 | Thr | ACU | 385 | 1.6453 |
| Lys | AAG | 237 | 0.532 | Val | GUA | 390 | 1.49 |
| Leu | CUA | 232 | 0.7686 | Val | GUC | 127 | 0.4852 |
| Leu | CUC | 126 | 0.4174 | Val | GUG | 152 | 0.5807 |
| Leu | CUG | 113 | 0.3744 | Val | GUU | 378 | 1.4441 |
| Leu | CUU | 377 | 1.249 | Trp | UGG | 303 | 1 |
| Leu | UUA | 593 | 1.9647 | Tyr | UAC | 121 | 0.3678 |
| Leu | UUG | 370 | 1.2258 | Tyr | UAU | 537 | 1.6322 |
| *Lilium amabile* | Ter | UAA | 34 | 1.5455 | Met | AUG | 418 | 1 |
| Ter | UAG | 16 | 0.7273 | Asn | AAC | 179 | 0.4293 |
| Ter | UGA | 16 | 0.7273 | Asn | AAU | 655 | 1.5707 |
| Ala | GCA | 301 | 1.1358 | Pro | CCA | 225 | 1.1524 |
| Ala | GCC | 170 | 0.6415 | Pro | CCC | 166 | 0.8502 |
| Ala | GCG | 117 | 0.4415 | Pro | CCG | 86 | 0.4405 |
| Ala | GCU | 472 | 1.7811 | Pro | CCU | 304 | 1.557 |
| Cys | UGC | 49 | 0.4851 | Gln | CAA | 482 | 1.474 |
| Cys | UGU | 153 | 1.5149 | Gln | CAG | 172 | 0.526 |
| Asp | GAC | 142 | 0.3939 | Arg | AGA | 341 | 1.809 |
| Asp | GAU | 579 | 1.6061 | Arg | AGG | 105 | 0.557 |
| Glu | GAA | 712 | 1.4756 | Arg | CGA | 257 | 1.3634 |
| Glu | GAG | 253 | 0.5244 | Arg | CGC | 69 | 0.366 |
| Phe | UUC | 355 | 0.7267 | Arg | CGG | 93 | 0.4934 |
| Phe | UUU | 622 | 1.2733 | Arg | CGU | 266 | 1.4111 |
| Gly | GGA | 495 | 1.5091 | Ser | AGC | 73 | 0.3283 |
| Gly | GGC | 149 | 0.4543 | Ser | AGU | 298 | 1.3403 |
| Gly | GGG | 234 | 0.7134 | Ser | UCA | 257 | 1.1559 |
| Gly | GGU | 434 | 1.3232 | Ser | UCC | 230 | 1.0345 |
| His | CAC | 91 | 0.3982 | Ser | UCG | 107 | 0.4813 |
| His | CAU | 366 | 1.6018 | Ser | UCU | 369 | 1.6597 |
| Ile | AUA | 473 | 0.9397 | Thr | ACA | 278 | 1.1893 |
| Ile | AUC | 298 | 0.5921 | Thr | ACC | 167 | 0.7144 |
| Ile | AUU | 739 | 1.4682 | Thr | ACG | 105 | 0.4492 |
| Lys | AAA | 654 | 1.4647 | Thr | ACU | 385 | 1.6471 |
| Lys | AAG | 239 | 0.5353 | Val | GUA | 389 | 1.4862 |
| Leu | CUA | 232 | 0.7691 | Val | GUC | 127 | 0.4852 |
| Leu | CUC | 126 | 0.4177 | Val | GUG | 153 | 0.5845 |
| Leu | CUG | 113 | 0.3746 | Val | GUU | 378 | 1.4441 |
| Leu | CUU | 377 | 1.2497 | Trp | UGG | 303 | 1 |
| Leu | UUA | 593 | 1.9657 | Tyr | UAC | 121 | 0.3678 |
| Leu | UUG | 369 | 1.2232 | Tyr | UAU | 537 | 1.6322 |
| *Lilium henryi* | Ter | UAA | 41 | 1.5974 | Met | AUG | 547 | 1 |
| Ter | UAG | 18 | 0.7013 | Asn | AAC | 233 | 0.426 |
| Ter | UGA | 18 | 0.7013 | Asn | AAU | 861 | 1.574 |
| Ala | GCA | 353 | 1.1461 | Pro | CCA | 266 | 1.1528 |
| Ala | GCC | 193 | 0.6266 | Pro | CCC | 198 | 0.8581 |
| Ala | GCG | 141 | 0.4578 | Pro | CCG | 103 | 0.4464 |
| Ala | GCU | 545 | 1.7695 | Pro | CCU | 356 | 1.5428 |
| Cys | UGC | 62 | 0.4825 | Gln | CAA | 600 | 1.5113 |
| Cys | UGU | 195 | 1.5175 | Gln | CAG | 194 | 0.4887 |
| Asp | GAC | 179 | 0.3978 | Arg | AGA | 411 | 1.8527 |
| Asp | GAU | 721 | 1.6022 | Arg | AGG | 123 | 0.5545 |
| Glu | GAA | 905 | 1.5274 | Arg | CGA | 301 | 1.3569 |
| Glu | GAG | 280 | 0.4726 | Arg | CGC | 76 | 0.3426 |
| Phe | UUC | 425 | 0.6682 | Arg | CGG | 112 | 0.5049 |
| Phe | UUU | 847 | 1.3318 | Arg | CGU | 308 | 1.3884 |
| Gly | GGA | 618 | 1.5959 | Ser | AGC | 85 | 0.2962 |
| Gly | GGC | 174 | 0.4493 | Ser | AGU | 376 | 1.3101 |
| Gly | GGG | 259 | 0.6688 | Ser | UCA | 355 | 1.2369 |
| Gly | GGU | 498 | 1.286 | Ser | UCC | 276 | 0.9617 |
| His | CAC | 110 | 0.4082 | Ser | UCG | 149 | 0.5192 |
| His | CAU | 429 | 1.5918 | Ser | UCU | 481 | 1.676 |
| Ile | AUA | 673 | 1.009 | Thr | ACA | 372 | 1.2817 |
| Ile | AUC | 374 | 0.5607 | Thr | ACC | 207 | 0.7132 |
| Ile | AUU | 954 | 1.4303 | Thr | ACG | 116 | 0.3997 |
| Lys | AAA | 902 | 1.5071 | Thr | ACU | 466 | 1.6055 |
| Lys | AAG | 295 | 0.4929 | Val | GUA | 467 | 1.4674 |
| Leu | CUA | 306 | 0.789 | Val | GUC | 159 | 0.4996 |
| Leu | CUC | 149 | 0.3842 | Val | GUG | 173 | 0.5436 |
| Leu | CUG | 129 | 0.3326 | Val | GUU | 474 | 1.4894 |
| Leu | CUU | 492 | 1.2686 | Trp | UGG | 398 | 1 |
| Leu | UUA | 797 | 2.055 | Tyr | UAC | 162 | 0.3703 |
| Leu | UUG | 454 | 1.1706 | Tyr | UAU | 713 | 1.6297 |
| *Lilium duchartrei* | Ter | UAA | 39 | 1.5195 | Met | AUG | 544 | 1 |
| Ter | UAG | 18 | 0.7013 | Asn | AAC | 232 | 0.4245 |
| Ter | UGA | 20 | 0.7792 | Asn | AAU | 861 | 1.5755 |
| Ala | GCA | 357 | 1.1516 | Pro | CCA | 263 | 1.1373 |
| Ala | GCC | 195 | 0.629 | Pro | CCC | 199 | 0.8605 |
| Ala | GCG | 141 | 0.4548 | Pro | CCG | 104 | 0.4497 |
| Ala | GCU | 547 | 1.7645 | Pro | CCU | 359 | 1.5524 |
| Cys | UGC | 62 | 0.4825 | Gln | CAA | 602 | 1.5145 |
| Cys | UGU | 195 | 1.5175 | Gln | CAG | 193 | 0.4855 |
| Asp | GAC | 181 | 0.3996 | Arg | AGA | 407 | 1.8416 |
| Asp | GAU | 725 | 1.6004 | Arg | AGG | 121 | 0.5475 |
| Glu | GAA | 903 | 1.5215 | Arg | CGA | 299 | 1.3529 |
| Glu | GAG | 284 | 0.4785 | Arg | CGC | 81 | 0.3665 |
| Phe | UUC | 425 | 0.6714 | Arg | CGG | 111 | 0.5023 |
| Phe | UUU | 841 | 1.3286 | Arg | CGU | 307 | 1.3891 |
| Gly | GGA | 620 | 1.6 | Ser | AGC | 83 | 0.2905 |
| Gly | GGC | 173 | 0.4465 | Ser | AGU | 373 | 1.3057 |
| Gly | GGG | 258 | 0.6658 | Ser | UCA | 355 | 1.2427 |
| Gly | GGU | 499 | 1.2877 | Ser | UCC | 274 | 0.9592 |
| His | CAC | 110 | 0.412 | Ser | UCG | 148 | 0.5181 |
| His | CAU | 424 | 1.588 | Ser | UCU | 481 | 1.6838 |
| Ile | AUA | 677 | 1.015 | Thr | ACA | 370 | 1.2737 |
| Ile | AUC | 369 | 0.5532 | Thr | ACC | 207 | 0.7126 |
| Ile | AUU | 955 | 1.4318 | Thr | ACG | 115 | 0.3959 |
| Lys | AAA | 905 | 1.5083 | Thr | ACU | 470 | 1.6179 |
| Lys | AAG | 295 | 0.4917 | Val | GUA | 467 | 1.4686 |
| Leu | CUA | 304 | 0.7808 | Val | GUC | 160 | 0.5031 |
| Leu | CUC | 146 | 0.375 | Val | GUG | 172 | 0.5409 |
| Leu | CUG | 131 | 0.3365 | Val | GUU | 473 | 1.4874 |
| Leu | CUU | 494 | 1.2688 | Trp | UGG | 399 | 1 |
| Leu | UUA | 806 | 2.0702 | Tyr | UAC | 159 | 0.3634 |
| Leu | UUG | 455 | 1.1687 | Tyr | UAU | 716 | 1.6366 |
| *Lilium taliense* | Ter | UAA | 39 | 1.5195 | Met | AUG | 550 | 1 |
| Ter | UAG | 18 | 0.7013 | Asn | AAC | 231 | 0.4208 |
| Ter | UGA | 20 | 0.7792 | Asn | AAU | 867 | 1.5792 |
| Ala | GCA | 357 | 1.1507 | Pro | CCA | 264 | 1.1453 |
| Ala | GCC | 196 | 0.6317 | Pro | CCC | 200 | 0.8677 |
| Ala | GCG | 143 | 0.4609 | Pro | CCG | 102 | 0.4425 |
| Ala | GCU | 545 | 1.7566 | Pro | CCU | 356 | 1.5445 |
| Cys | UGC | 62 | 0.4806 | Gln | CAA | 605 | 1.5125 |
| Cys | UGU | 196 | 1.5194 | Gln | CAG | 195 | 0.4875 |
| Asp | GAC | 181 | 0.4018 | Arg | AGA | 410 | 1.8608 |
| Asp | GAU | 720 | 1.5982 | Arg | AGG | 121 | 0.5492 |
| Glu | GAA | 904 | 1.5245 | Arg | CGA | 297 | 1.348 |
| Glu | GAG | 282 | 0.4755 | Arg | CGC | 81 | 0.3676 |
| Phe | UUC | 423 | 0.6682 | Arg | CGG | 108 | 0.4902 |
| Phe | UUU | 843 | 1.3318 | Arg | CGU | 305 | 1.3843 |
| Gly | GGA | 622 | 1.6062 | Ser | AGC | 86 | 0.2997 |
| Gly | GGC | 171 | 0.4416 | Ser | AGU | 376 | 1.3101 |
| Gly | GGG | 258 | 0.6662 | Ser | UCA | 358 | 1.2474 |
| Gly | GGU | 498 | 1.286 | Ser | UCC | 277 | 0.9652 |
| His | CAC | 110 | 0.4089 | Ser | UCG | 150 | 0.5226 |
| His | CAU | 428 | 1.5911 | Ser | UCU | 475 | 1.6551 |
| Ile | AUA | 679 | 1.016 | Thr | ACA | 371 | 1.2793 |
| Ile | AUC | 370 | 0.5536 | Thr | ACC | 208 | 0.7172 |
| Ile | AUU | 956 | 1.4304 | Thr | ACG | 114 | 0.3931 |
| Lys | AAA | 902 | 1.5071 | Thr | ACU | 467 | 1.6103 |
| Lys | AAG | 295 | 0.4929 | Val | GUA | 464 | 1.473 |
| Leu | CUA | 307 | 0.7885 | Val | GUC | 156 | 0.4952 |
| Leu | CUC | 150 | 0.3853 | Val | GUG | 169 | 0.5365 |
| Leu | CUG | 128 | 0.3288 | Val | GUU | 471 | 1.4952 |
| Leu | CUU | 491 | 1.2611 | Trp | UGG | 400 | 1 |
| Leu | UUA | 803 | 2.0625 | Tyr | UAC | 161 | 0.3688 |
| Leu | UUG | 457 | 1.1738 | Tyr | UAU | 712 | 1.6312 |
| *Lilium fargesii* | Ter | UAA | 39 | 1.5 | Met | AUG | 546 | 1 |
| Ter | UAG | 18 | 0.6923 | Asn | AAC | 231 | 0.4196 |
| Ter | UGA | 21 | 0.8077 | Asn | AAU | 870 | 1.5804 |
| Ala | GCA | 356 | 1.1419 | Pro | CCA | 268 | 1.1539 |
| Ala | GCC | 194 | 0.6223 | Pro | CCC | 202 | 0.8698 |
| Ala | GCG | 144 | 0.4619 | Pro | CCG | 100 | 0.4306 |
| Ala | GCU | 553 | 1.7739 | Pro | CCU | 359 | 1.5457 |
| Cys | UGC | 64 | 0.4885 | Gln | CAA | 604 | 1.5176 |
| Cys | UGU | 198 | 1.5115 | Gln | CAG | 192 | 0.4824 |
| Asp | GAC | 182 | 0.4035 | Arg | AGA | 413 | 1.8604 |
| Asp | GAU | 720 | 1.5965 | Arg | AGG | 122 | 0.5495 |
| Glu | GAA | 901 | 1.522 | Arg | CGA | 297 | 1.3378 |
| Glu | GAG | 283 | 0.478 | Arg | CGC | 80 | 0.3604 |
| Phe | UUC | 431 | 0.674 | Arg | CGG | 113 | 0.509 |
| Phe | UUU | 848 | 1.326 | Arg | CGU | 307 | 1.3829 |
| Gly | GGA | 618 | 1.5897 | Ser | AGC | 86 | 0.2984 |
| Gly | GGC | 170 | 0.4373 | Ser | AGU | 375 | 1.3013 |
| Gly | GGG | 264 | 0.6791 | Ser | UCA | 357 | 1.2389 |
| Gly | GGU | 503 | 1.2939 | Ser | UCC | 276 | 0.9578 |
| His | CAC | 109 | 0.4052 | Ser | UCG | 150 | 0.5205 |
| His | CAU | 429 | 1.5948 | Ser | UCU | 485 | 1.6831 |
| Ile | AUA | 676 | 1.0095 | Thr | ACA | 370 | 1.2792 |
| Ile | AUC | 371 | 0.554 | Thr | ACC | 201 | 0.6949 |
| Ile | AUU | 962 | 1.4365 | Thr | ACG | 117 | 0.4045 |
| Lys | AAA | 906 | 1.51 | Thr | ACU | 469 | 1.6214 |
| Lys | AAG | 294 | 0.49 | Val | GUA | 469 | 1.4725 |
| Leu | CUA | 309 | 0.7899 | Val | GUC | 161 | 0.5055 |
| Leu | CUC | 149 | 0.3809 | Val | GUG | 172 | 0.54 |
| Leu | CUG | 126 | 0.3221 | Val | GUU | 472 | 1.4819 |
| Leu | CUU | 497 | 1.2706 | Trp | UGG | 399 | 1 |
| Leu | UUA | 811 | 2.0733 | Tyr | UAC | 160 | 0.3666 |
| Leu | UUG | 455 | 1.1632 | Tyr | UAU | 713 | 1.6334 |
| *Lilium tsingtauense* | Ter | UAA | 42 | 1.6154 | Met | AUG | 548 | 1 |
| Ter | UAG | 19 | 0.7308 | Asn | AAC | 229 | 0.4167 |
| Ter | UGA | 17 | 0.6538 | Asn | AAU | 870 | 1.5833 |
| Ala | GCA | 362 | 1.1631 | Pro | CCA | 268 | 1.1552 |
| Ala | GCC | 193 | 0.6201 | Pro | CCC | 197 | 0.8491 |
| Ala | GCG | 135 | 0.4337 | Pro | CCG | 102 | 0.4397 |
| Ala | GCU | 555 | 1.7831 | Pro | CCU | 361 | 1.556 |
| Cys | UGC | 60 | 0.4598 | Gln | CAA | 604 | 1.5195 |
| Cys | UGU | 201 | 1.5402 | Gln | CAG | 191 | 0.4805 |
| Asp | GAC | 182 | 0.4013 | Arg | AGA | 420 | 1.8722 |
| Asp | GAU | 725 | 1.5987 | Arg | AGG | 121 | 0.5394 |
| Glu | GAA | 899 | 1.5199 | Arg | CGA | 301 | 1.3418 |
| Glu | GAG | 284 | 0.4801 | Arg | CGC | 81 | 0.3611 |
| Phe | UUC | 426 | 0.6693 | Arg | CGG | 110 | 0.4903 |
| Phe | UUU | 847 | 1.3307 | Arg | CGU | 313 | 1.3952 |
| Gly | GGA | 612 | 1.5753 | Ser | AGC | 85 | 0.2948 |
| Gly | GGC | 169 | 0.435 | Ser | AGU | 380 | 1.3179 |
| Gly | GGG | 270 | 0.695 | Ser | UCA | 357 | 1.2382 |
| Gly | GGU | 503 | 1.2947 | Ser | UCC | 278 | 0.9642 |
| His | CAC | 110 | 0.4052 | Ser | UCG | 149 | 0.5168 |
| His | CAU | 433 | 1.5948 | Ser | UCU | 481 | 1.6682 |
| Ile | AUA | 673 | 1.0075 | Thr | ACA | 367 | 1.2558 |
| Ile | AUC | 368 | 0.5509 | Thr | ACC | 209 | 0.7151 |
| Ile | AUU | 963 | 1.4416 | Thr | ACG | 122 | 0.4175 |
| Lys | AAA | 908 | 1.5071 | Thr | ACU | 471 | 1.6116 |
| Lys | AAG | 297 | 0.4929 | Val | GUA | 469 | 1.4679 |
| Leu | CUA | 302 | 0.772 | Val | GUC | 161 | 0.5039 |
| Leu | CUC | 151 | 0.386 | Val | GUG | 175 | 0.5477 |
| Leu | CUG | 130 | 0.3323 | Val | GUU | 473 | 1.4804 |
| Leu | CUU | 496 | 1.268 | Trp | UGG | 402 | 1 |
| Leu | UUA | 814 | 2.081 | Tyr | UAC | 160 | 0.3682 |
| Leu | UUG | 454 | 1.1606 | Tyr | UAU | 709 | 1.6318 |
| *Lilium jiulongense* ZHB | Ter | UAA | 50 | 1.5957 | Met | AUG | 542 | 1 |
| Ter | UAG | 17 | 0.5426 | Asn | AAC | 231 | 0.4223 |
| Ter | UGA | 27 | 0.8617 | Asn | AAU | 863 | 1.5777 |
| Ala | GCA | 355 | 1.1452 | Pro | CCA | 262 | 1.1293 |
| Ala | GCC | 197 | 0.6355 | Pro | CCC | 202 | 0.8707 |
| Ala | GCG | 142 | 0.4581 | Pro | CCG | 105 | 0.4526 |
| Ala | GCU | 546 | 1.7613 | Pro | CCU | 359 | 1.5474 |
| Cys | UGC | 62 | 0.4733 | Gln | CAA | 599 | 1.5222 |
| Cys | UGU | 200 | 1.5267 | Gln | CAG | 188 | 0.4778 |
| Asp | GAC | 182 | 0.4044 | Arg | AGA | 415 | 1.861 |
| Asp | GAU | 718 | 1.5956 | Arg | AGG | 120 | 0.5381 |
| Glu | GAA | 889 | 1.5158 | Arg | CGA | 304 | 1.3632 |
| Glu | GAG | 284 | 0.4842 | Arg | CGC | 82 | 0.3677 |
| Phe | UUC | 431 | 0.6761 | Arg | CGG | 113 | 0.5067 |
| Phe | UUU | 844 | 1.3239 | Arg | CGU | 304 | 1.3632 |
| Gly | GGA | 625 | 1.6088 | Ser | AGC | 85 | 0.297 |
| Gly | GGC | 174 | 0.4479 | Ser | AGU | 374 | 1.3069 |
| Gly | GGG | 258 | 0.6641 | Ser | UCA | 351 | 1.2266 |
| Gly | GGU | 497 | 1.2793 | Ser | UCC | 273 | 0.954 |
| His | CAC | 110 | 0.412 | Ser | UCG | 149 | 0.5207 |
| His | CAU | 424 | 1.588 | Ser | UCU | 485 | 1.6948 |
| Ile | AUA | 672 | 1.0166 | Thr | ACA | 369 | 1.2812 |
| Ile | AUC | 371 | 0.5613 | Thr | ACC | 207 | 0.7188 |
| Ile | AUU | 940 | 1.4221 | Thr | ACG | 113 | 0.3924 |
| Lys | AAA | 905 | 1.5046 | Thr | ACU | 463 | 1.6076 |
| Lys | AAG | 298 | 0.4954 | Val | GUA | 465 | 1.4797 |
| Leu | CUA | 298 | 0.772 | Val | GUC | 156 | 0.4964 |
| Leu | CUC | 143 | 0.3705 | Val | GUG | 172 | 0.5473 |
| Leu | CUG | 130 | 0.3368 | Val | GUU | 464 | 1.4765 |
| Leu | CUU | 488 | 1.2642 | Trp | UGG | 393 | 1 |
| Leu | UUA | 800 | 2.0725 | Tyr | UAC | 164 | 0.3706 |
| Leu | UUG | 457 | 1.1839 | Tyr | UAU | 721 | 1.6294 |
| *Lilium jiulongense* XHB | Ter | UAA | 41 | 1.5974 | Met | AUG | 543 | 1 |
| Ter | UAG | 17 | 0.6623 | Asn | AAC | 231 | 0.4246 |
| Ter | UGA | 19 | 0.7403 | Asn | AAU | 857 | 1.5754 |
| Ala | GCA | 355 | 1.1442 | Pro | CCA | 262 | 1.1367 |
| Ala | GCC | 196 | 0.6317 | Pro | CCC | 199 | 0.8633 |
| Ala | GCG | 142 | 0.4577 | Pro | CCG | 104 | 0.4512 |
| Ala | GCU | 548 | 1.7663 | Pro | CCU | 357 | 1.5488 |
| Cys | UGC | 62 | 0.4825 | Gln | CAA | 600 | 1.5152 |
| Cys | UGU | 195 | 1.5175 | Gln | CAG | 192 | 0.4848 |
| Asp | GAC | 181 | 0.4027 | Arg | AGA | 407 | 1.8458 |
| Asp | GAU | 718 | 1.5973 | Arg | AGG | 119 | 0.5397 |
| Glu | GAA | 895 | 1.5182 | Arg | CGA | 299 | 1.356 |
| Glu | GAG | 284 | 0.4818 | Arg | CGC | 81 | 0.3673 |
| Phe | UUC | 423 | 0.6693 | Arg | CGG | 110 | 0.4989 |
| Phe | UUU | 841 | 1.3307 | Arg | CGU | 307 | 1.3923 |
| Gly | GGA | 623 | 1.6067 | Ser | AGC | 84 | 0.2953 |
| Gly | GGC | 173 | 0.4462 | Ser | AGU | 372 | 1.3076 |
| Gly | GGG | 257 | 0.6628 | Ser | UCA | 352 | 1.2373 |
| Gly | GGU | 498 | 1.2843 | Ser | UCC | 273 | 0.9596 |
| His | CAC | 110 | 0.4104 | Ser | UCG | 150 | 0.5272 |
| His | CAU | 426 | 1.5896 | Ser | UCU | 476 | 1.6731 |
| Ile | AUA | 679 | 1.02 | Thr | ACA | 369 | 1.2768 |
| Ile | AUC | 370 | 0.5558 | Thr | ACC | 205 | 0.7093 |
| Ile | AUU | 948 | 1.4241 | Thr | ACG | 115 | 0.3979 |
| Lys | AAA | 898 | 1.5042 | Thr | ACU | 467 | 1.6159 |
| Lys | AAG | 296 | 0.4958 | Val | GUA | 465 | 1.4704 |
| Leu | CUA | 301 | 0.7768 | Val | GUC | 158 | 0.4996 |
| Leu | CUC | 144 | 0.3716 | Val | GUG | 171 | 0.5407 |
| Leu | CUG | 130 | 0.3355 | Val | GUU | 471 | 1.4893 |
| Leu | CUU | 494 | 1.2748 | Trp | UGG | 394 | 1 |
| Leu | UUA | 804 | 2.0748 | Tyr | UAC | 161 | 0.3667 |
| Leu | UUG | 452 | 1.1665 | Tyr | UAU | 717 | 1.6333 |
| *Lilium jiulongense* SHB | Ter | UAA | 41 | 1.5974 | Met | AUG | 543 | 1 |
| Ter | UAG | 17 | 0.6623 | Asn | AAC | 231 | 0.4246 |
| Ter | UGA | 19 | 0.7403 | Asn | AAU | 857 | 1.5754 |
| Ala | GCA | 355 | 1.1442 | Pro | CCA | 262 | 1.1367 |
| Ala | GCC | 196 | 0.6317 | Pro | CCC | 199 | 0.8633 |
| Ala | GCG | 142 | 0.4577 | Pro | CCG | 104 | 0.4512 |
| Ala | GCU | 548 | 1.7663 | Pro | CCU | 357 | 1.5488 |
| Cys | UGC | 62 | 0.4825 | Gln | CAA | 600 | 1.5152 |
| Cys | UGU | 195 | 1.5175 | Gln | CAG | 192 | 0.4848 |
| Asp | GAC | 181 | 0.4027 | Arg | AGA | 407 | 1.8458 |
| Asp | GAU | 718 | 1.5973 | Arg | AGG | 119 | 0.5397 |
| Glu | GAA | 895 | 1.5182 | Arg | CGA | 299 | 1.356 |
| Glu | GAG | 284 | 0.4818 | Arg | CGC | 81 | 0.3673 |
| Phe | UUC | 423 | 0.6693 | Arg | CGG | 110 | 0.4989 |
| Phe | UUU | 841 | 1.3307 | Arg | CGU | 307 | 1.3923 |
| Gly | GGA | 623 | 1.6067 | Ser | AGC | 84 | 0.2951 |
| Gly | GGC | 173 | 0.4462 | Ser | AGU | 372 | 1.3068 |
| Gly | GGG | 257 | 0.6628 | Ser | UCA | 353 | 1.24 |
| Gly | GGU | 498 | 1.2843 | Ser | UCC | 273 | 0.959 |
| His | CAC | 110 | 0.4104 | Ser | UCG | 150 | 0.5269 |
| His | CAU | 426 | 1.5896 | Ser | UCU | 476 | 1.6721 |
| Ile | AUA | 679 | 1.02 | Thr | ACA | 369 | 1.2768 |
| Ile | AUC | 370 | 0.5558 | Thr | ACC | 205 | 0.7093 |
| Ile | AUU | 948 | 1.4241 | Thr | ACG | 115 | 0.3979 |
| Lys | AAA | 898 | 1.5042 | Thr | ACU | 467 | 1.6159 |
| Lys | AAG | 296 | 0.4958 | Val | GUA | 465 | 1.4704 |
| Leu | CUA | 301 | 0.7768 | Val | GUC | 158 | 0.4996 |
| Leu | CUC | 144 | 0.3716 | Val | GUG | 171 | 0.5407 |
| Leu | CUG | 130 | 0.3355 | Val | GUU | 471 | 1.4893 |
| Leu | CUU | 494 | 1.2748 | Trp | UGG | 394 | 1 |
| Leu | UUA | 804 | 2.0748 | Tyr | UAC | 161 | 0.3672 |
| Leu | UUG | 452 | 1.1665 | Tyr | UAU | 716 | 1.6328 |

**Table S5.** Frequency of amino acids in coding regions.

| **Species** | **Ala** | **Arg** | **Asn** | **Asp** | **Cys** | **Gln** | **Glu** | **Gly** | **His** | **Ile** | **Leu** | **Lys** | **Met** | **Phe** | **Pro** | **Ser** | **Thr** | **Trp** | **Tyr** | **Val** | **Total** |
| --- | --- | --- | --- | --- | --- | --- | --- | --- | --- | --- | --- | --- | --- | --- | --- | --- | --- | --- | --- | --- | --- |
| *Lilium jiulongense* SHB | 5.49 | 5.86 | 4.82 | 3.98 | 1.14 | 3.51 | 5.22 | 6.87 | 2.37 | 8.84 | 10.29 | 5.29 | 2.40 | 5.60 | 4.08 | 7.56 | 5.12 | 1.74 | 3.88 | 5.60 | 22588 |
| *Lilium jiulongense* XHB | 5.49 | 5.86 | 4.82 | 3.98 | 1.14 | 3.51 | 5.22 | 6.87 | 2.37 | 8.84 | 10.29 | 5.29 | 2.40 | 5.60 | 4.08 | 7.56 | 5.12 | 1.74 | 3.89 | 5.60 | 22627 |
| *Lilium_jiulongense* ZHB | 5.48 | 5.91 | 4.83 | 3.98 | 1.16 | 3.48 | 5.18 | 6.87 | 2.36 | 8.76 | 10.24 | 5.32 | 2.40 | 5.63 | 4.10 | 7.59 | 5.09 | 1.74 | 3.91 | 5.56 | 22588 |
| *Lilium amabile* | 5.87 | 6.26 | 4.62 | 3.99 | 1.12 | 3.62 | 5.34 | 7.26 | 2.53 | 8.36 | 10.02 | 4.94 | 2.31 | 5.41 | 4.32 | 7.38 | 5.17 | 1.68 | 3.64 | 5.79 | 18068 |
| *Lilium callosum* | 5.46 | 5.92 | 4.82 | 3.99 | 1.15 | 3.50 | 5.21 | 6.83 | 2.37 | 8.83 | 10.29 | 5.28 | 2.40 | 5.60 | 4.08 | 7.59 | 5.12 | 1.77 | 3.83 | 5.61 | 18069 |
| *Lilium distichum* | 5.47 | 5.85 | 4.82 | 4.00 | 1.13 | 3.51 | 5.24 | 6.84 | 2.36 | 8.83 | 10.31 | 5.30 | 2.40 | 5.59 | 4.08 | 7.56 | 5.13 | 1.76 | 3.86 | 5.61 | 22769 |
| *Lilium duchartrei* | 5.48 | 5.86 | 4.84 | 3.97 | 1.15 | 3.50 | 5.21 | 6.84 | 2.37 | 8.84 | 10.32 | 5.28 | 2.40 | 5.63 | 4.09 | 7.60 | 5.09 | 1.75 | 3.84 | 5.60 | 26,067 |
| Lilium fargesii | 5.82 | 5.90 | 4.57 | 3.88 | 1.16 | 3.51 | 5.04 | 7.19 | 2.41 | 8.86 | 10.40 | 4.70 | 2.42 | 5.57 | 4.18 | 7.63 | 5.12 | 1.75 | 3.78 | 5.75 | 22737 |
| *Lilium henricii* | 5.44 | 5.88 | 4.83 | 3.97 | 1.13 | 3.50 | 5.23 | 6.84 | 2.38 | 8.83 | 10.27 | 5.28 | 2.41 | 5.61 | 4.07 | 7.60 | 5.12 | 1.76 | 3.86 | 5.62 | 20898 |
| *Lilium henryi* | 5.49 | 5.86 | 4.82 | 3.99 | 1.14 | 3.51 | 5.23 | 6.86 | 2.37 | 8.83 | 10.31 | 5.30 | 2.41 | 5.59 | 4.08 | 7.55 | 5.12 | 1.77 | 3.86 | 5.59 | 22654 |
| *Lilium lankongense* | 5.47 | 5.84 | 4.85 | 3.96 | 1.14 | 3.52 | 5.23 | 6.85 | 2.39 | 8.84 | 10.30 | 5.29 | 2.42 | 5.60 | 4.07 | 7.58 | 5.12 | 1.76 | 3.86 | 5.58 | 22622 |
| *Lilium pardanthinum* | 5.46 | 5.89 | 4.82 | 3.99 | 1.15 | 3.51 | 5.22 | 6.79 | 2.39 | 8.84 | 10.30 | 5.25 | 2.41 | 5.62 | 4.06 | 7.60 | 5.14 | 1.77 | 3.83 | 5.60 | 22662 |
| *Lilium pensylvanicum* | 5.47 | 5.90 | 4.80 | 3.99 | 1.14 | 3.51 | 5.21 | 6.84 | 2.37 | 8.82 | 10.31 | 5.28 | 2.42 | 5.58 | 4.08 | 7.56 | 5.14 | 1.77 | 3.83 | 5.63 | 22625 |
| *Lilium pumilum* | 5.50 | 5.82 | 4.83 | 3.97 | 1.16 | 3.50 | 5.20 | 6.86 | 2.38 | 8.84 | 10.36 | 5.31 | 2.38 | 5.60 | 4.05 | 7.60 | 5.09 | 1.77 | 3.84 | 5.59 | 22764 |
| *Lilium speciosum* var. *gloriosoides* | 5.48 | 5.83 | 4.85 | 3.98 | 1.14 | 3.53 | 5.23 | 6.84 | 2.37 | 8.85 | 10.31 | 5.28 | 2.43 | 5.59 | 4.07 | 7.60 | 5.12 | 1.77 | 3.85 | 5.56 | 22730 |
| *Lilium taliense* | 5.47 | 5.91 | 4.83 | 3.98 | 1.15 | 3.49 | 5.20 | 6.83 | 2.39 | 8.80 | 10.31 | 5.29 | 2.41 | 5.59 | 4.08 | 7.60 | 5.14 | 1.77 | 3.82 | 5.61 | 22661 |
| *Lilium tsingtauense* | 5.49 | 5.87 | 4.84 | 3.99 | 1.13 | 3.50 | 5.22 | 6.84 | 2.37 | 8.85 | 10.28 | 5.30 | 2.40 | 5.61 | 4.08 | 7.56 | 5.10 | 1.76 | 3.88 | 5.60 | 22764 |
| *Lilium xanthellum* | 5.49 | 5.86 | 4.82 | 3.98 | 1.14 | 3.51 | 5.22 | 6.87 | 2.37 | 8.84 | 10.29 | 5.29 | 2.40 | 5.60 | 4.08 | 7.56 | 5.12 | 1.74 | 3.88 | 5.60 | 22657 |
